# Supplementary material for: Histone deacetylase 1 maintains lineage integrity through histone acetylome refinement during early embryogenesis
Source: eLife journal article supplement (doi:10.7554/elife.79380), 2023-03-27
Supplement: supp [file elife-79380-supp-v1.zip]

## Unprocessed Western Blots:

### Western Blots in Figure 1A:

Hdac1:

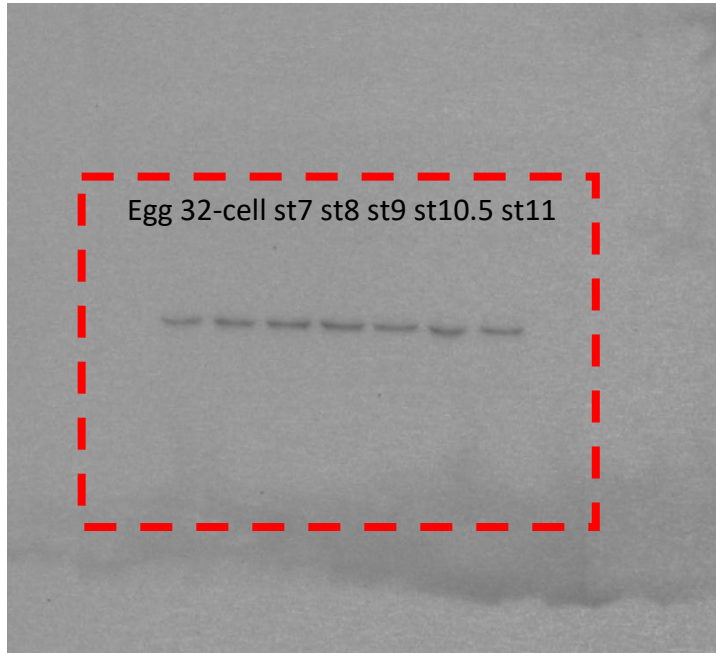

This is not developed on film, but by ChemiDoc MP Imaging system.

Hdac2

$\alpha$ -Tubulin

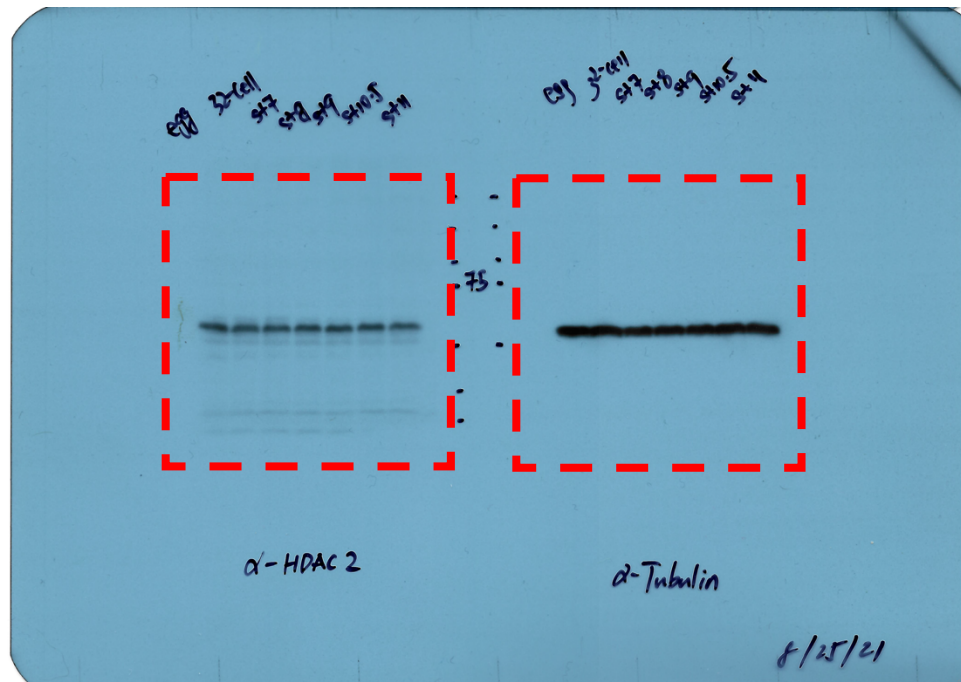

Figure 1. Hdac1 binds to genome gradually during early *Xenopus* development  
(A) Western blot analyses showing Hdac1 and Hdac2 proteins over a time course of early development.  $\alpha$ -tubulin is used as a loading control.
