# Supplementary material for: Histone deacetylase 1 maintains lineage integrity through histone acetylome refinement during early embryogenesis
Source: eLife journal article supplement (doi:10.7554/elife.79380), 2023-03-27
Supplement: supp [file elife-79380-supp-v1.zip]

Western Blots in Figure 4B:

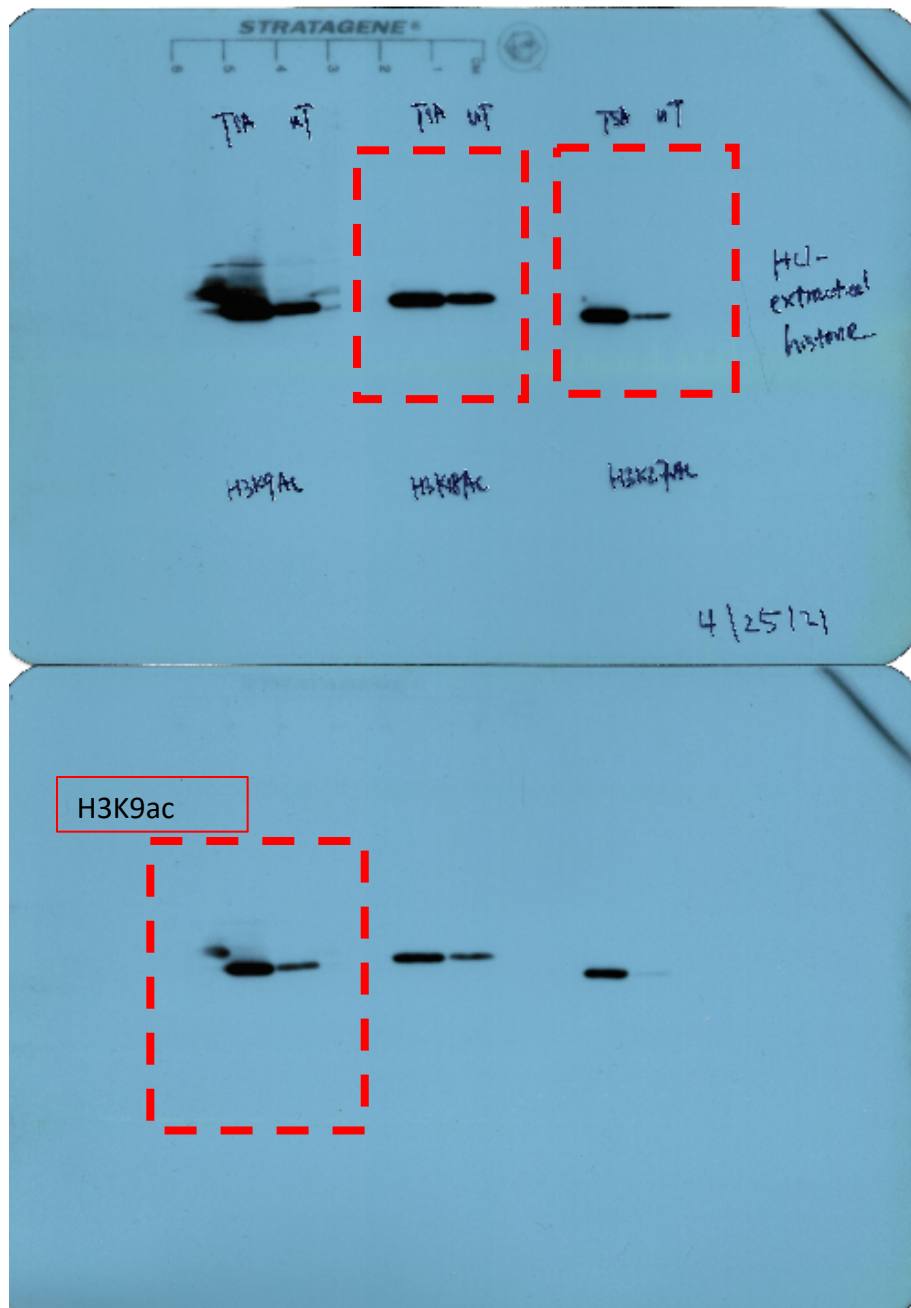

H3K18ac  
H3K27ac

H3K9ac

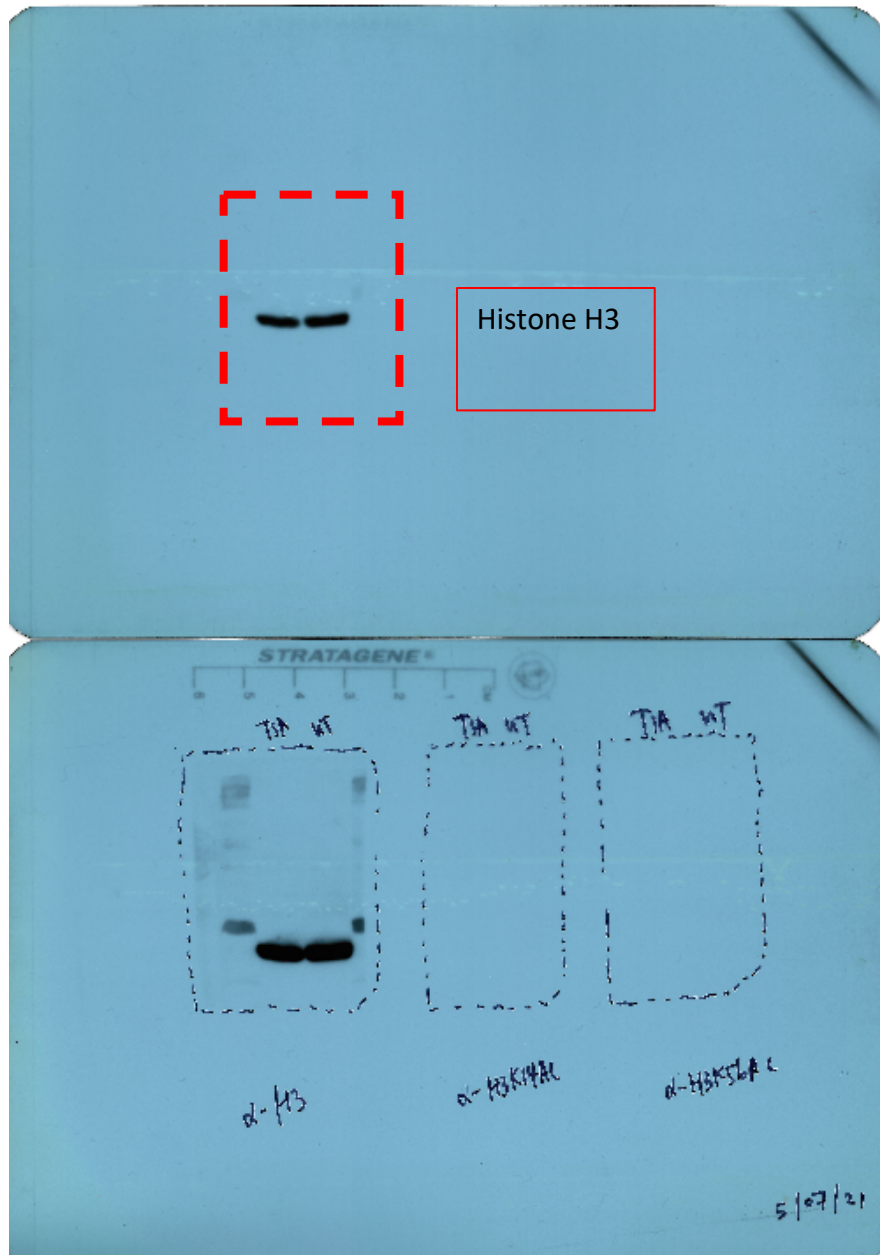

Figure 4: Hdac1 maintains differential H3 acetylomes between germ layers. (B) Western blot analyses showing various histone acetylation modifications affected by HDAC inhibition. anti-H3 is used as a loading control.
