# Supplementary figures and images for: Histone deacetylase 1 maintains lineage integrity through histone acetylome refinement during early embryogenesis
Source: eLife journal article supplement (doi:10.7554/elife.79380), 2023-03-27

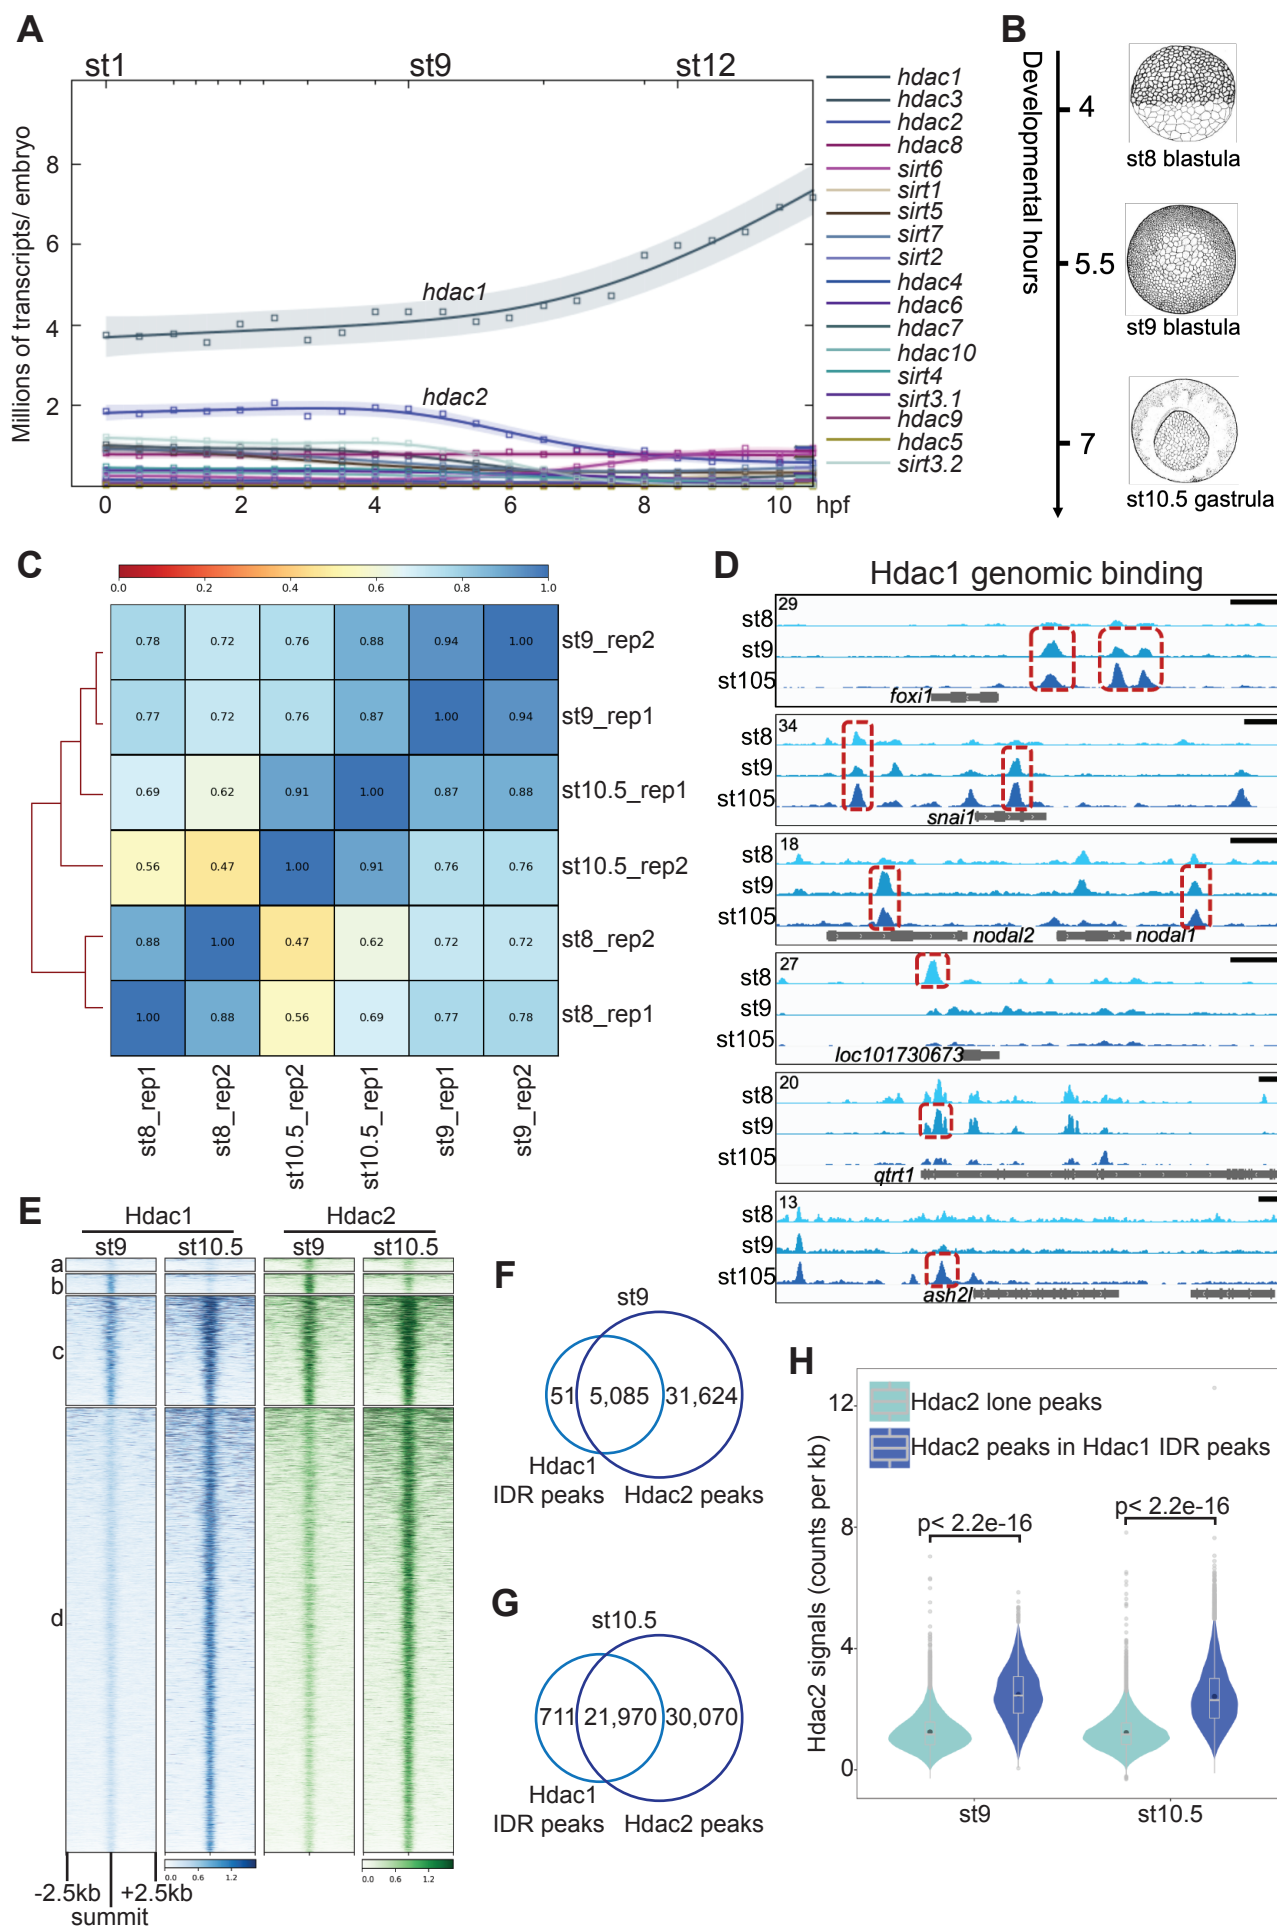

Supplement: supp [file elife-79380-supp-v1.zip]

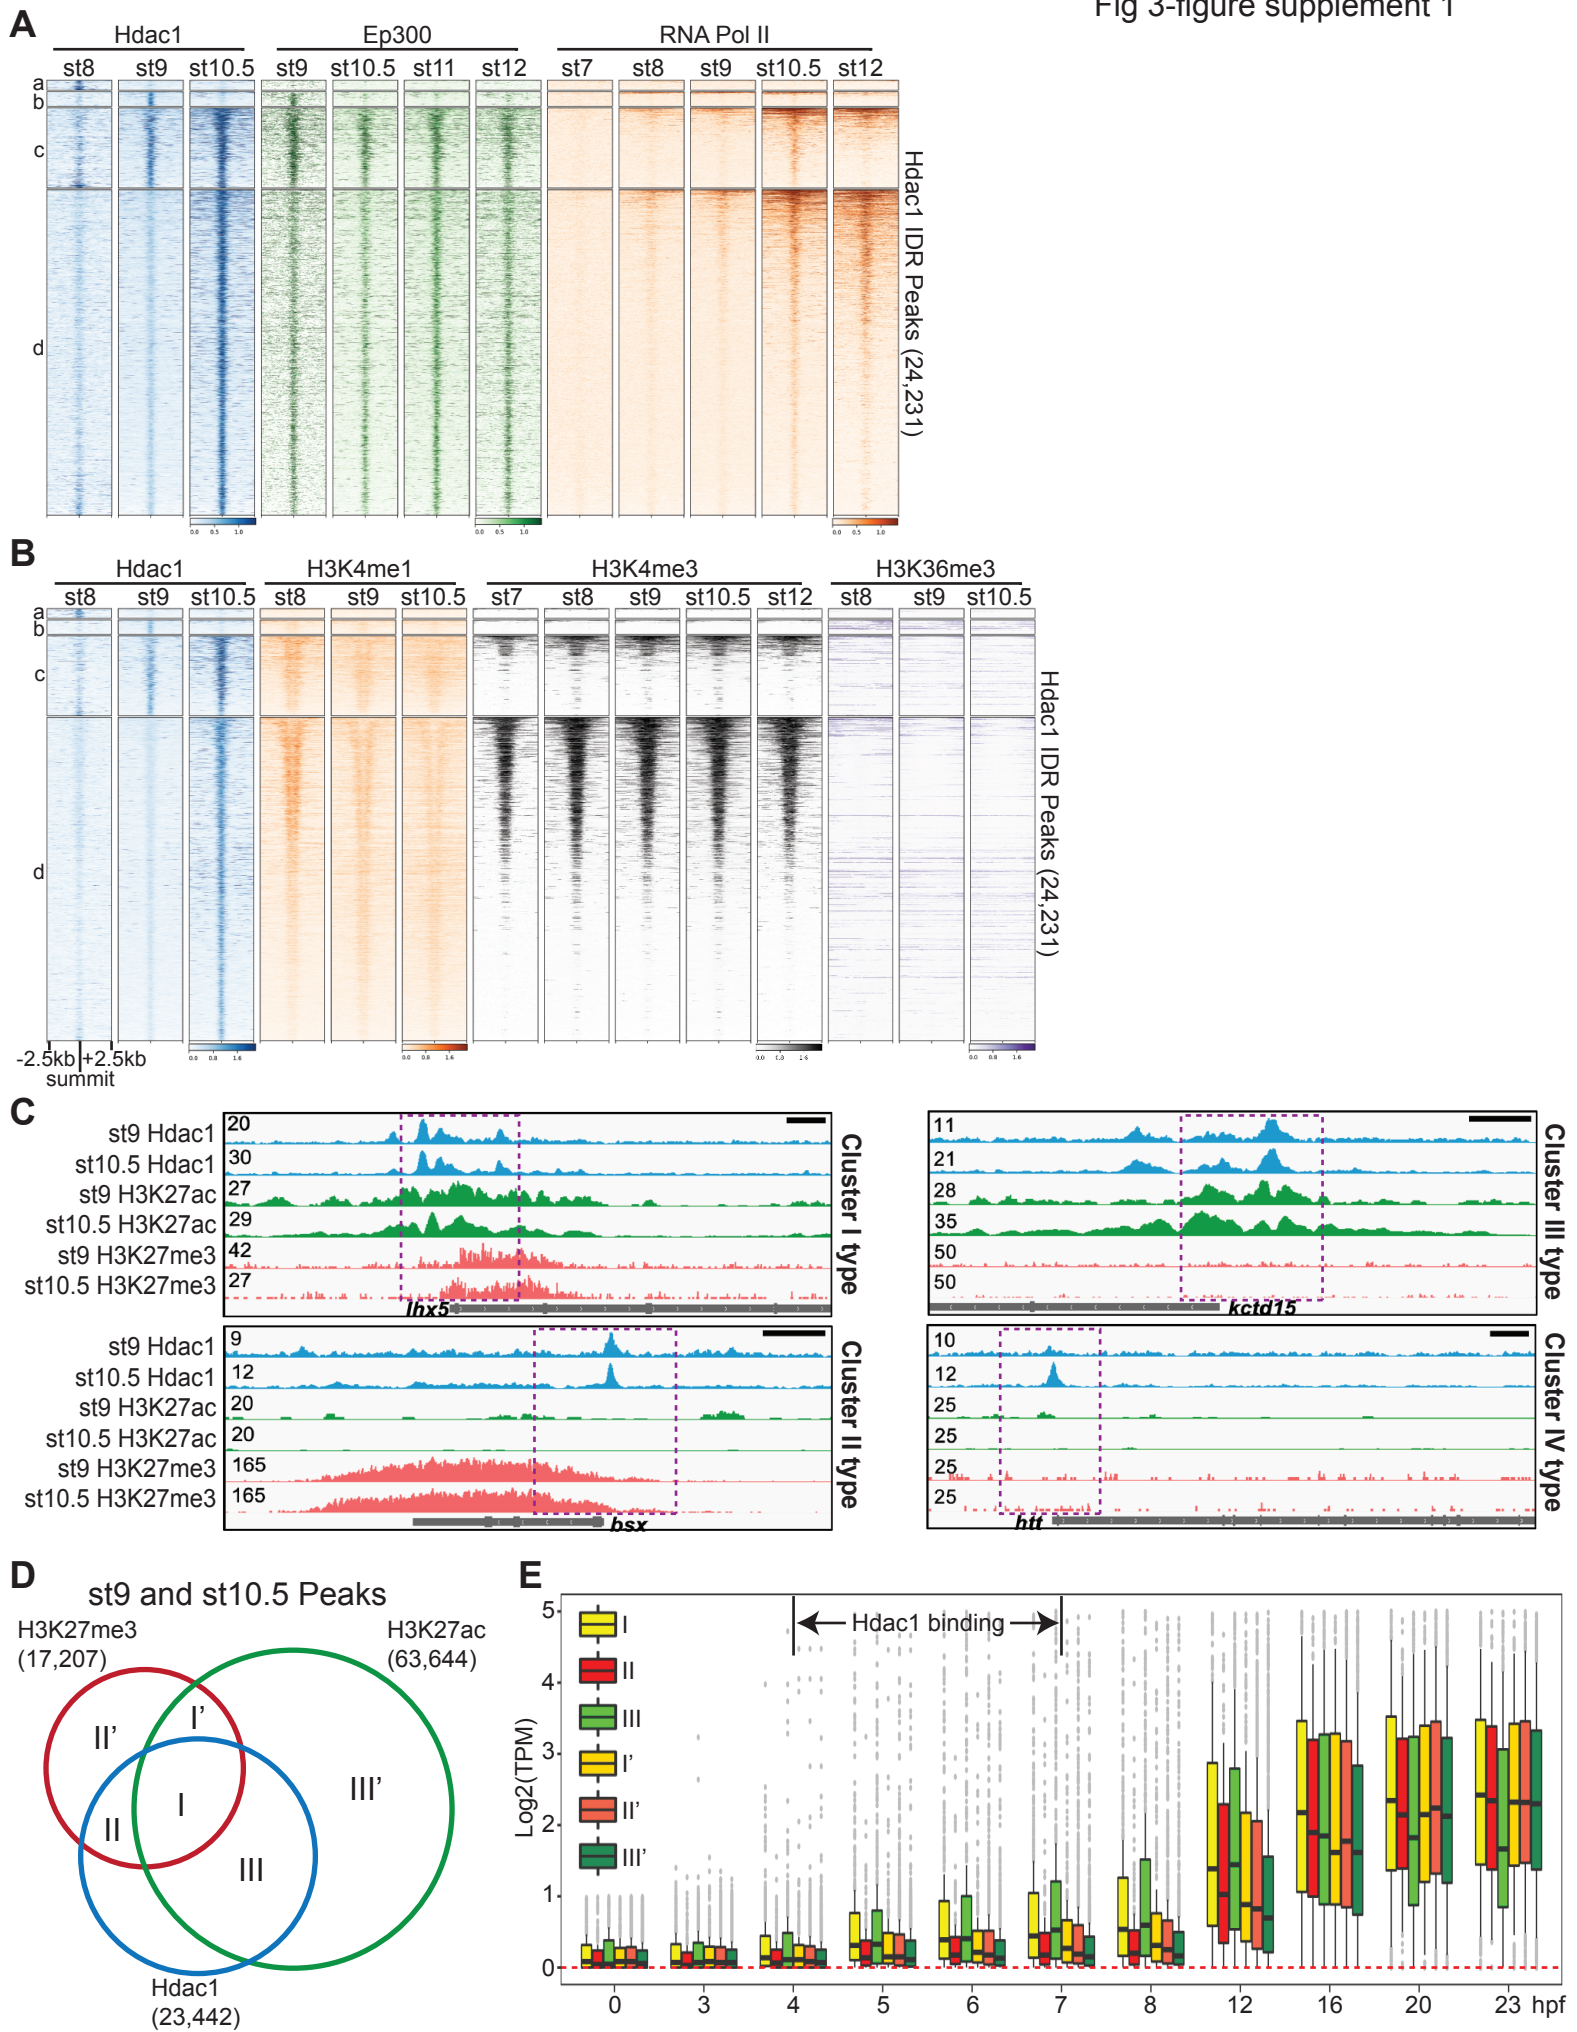

Supplement: supp [file elife-79380-supp-v1.zip]

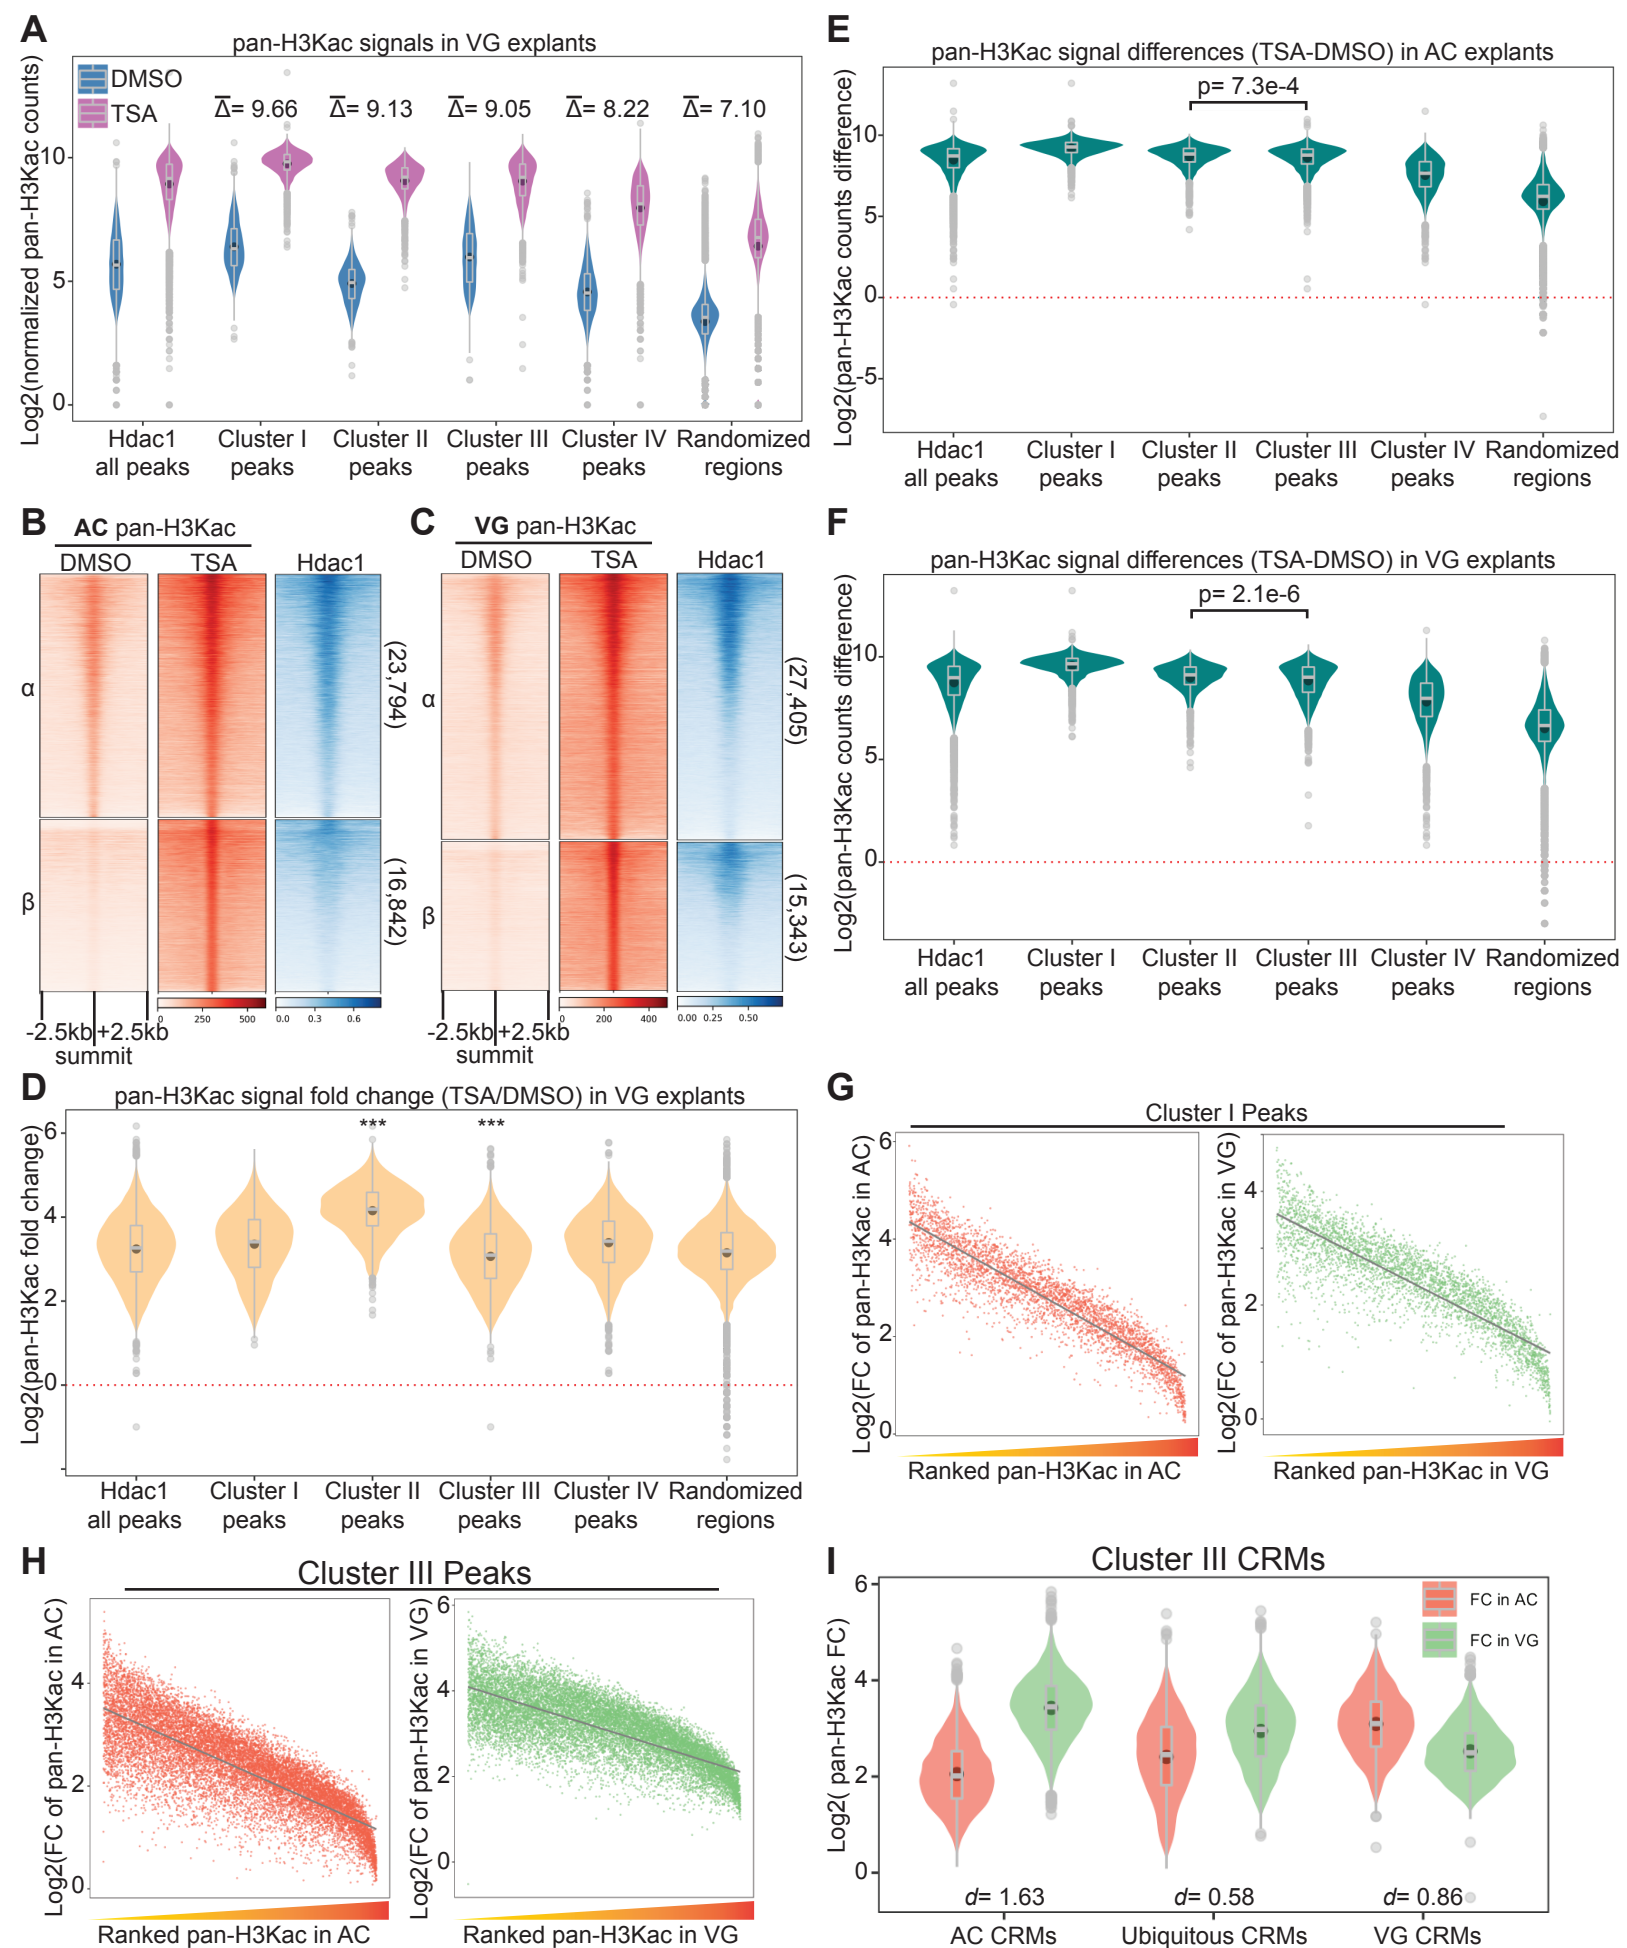

Supplement: supp [file elife-79380-supp-v1.zip]

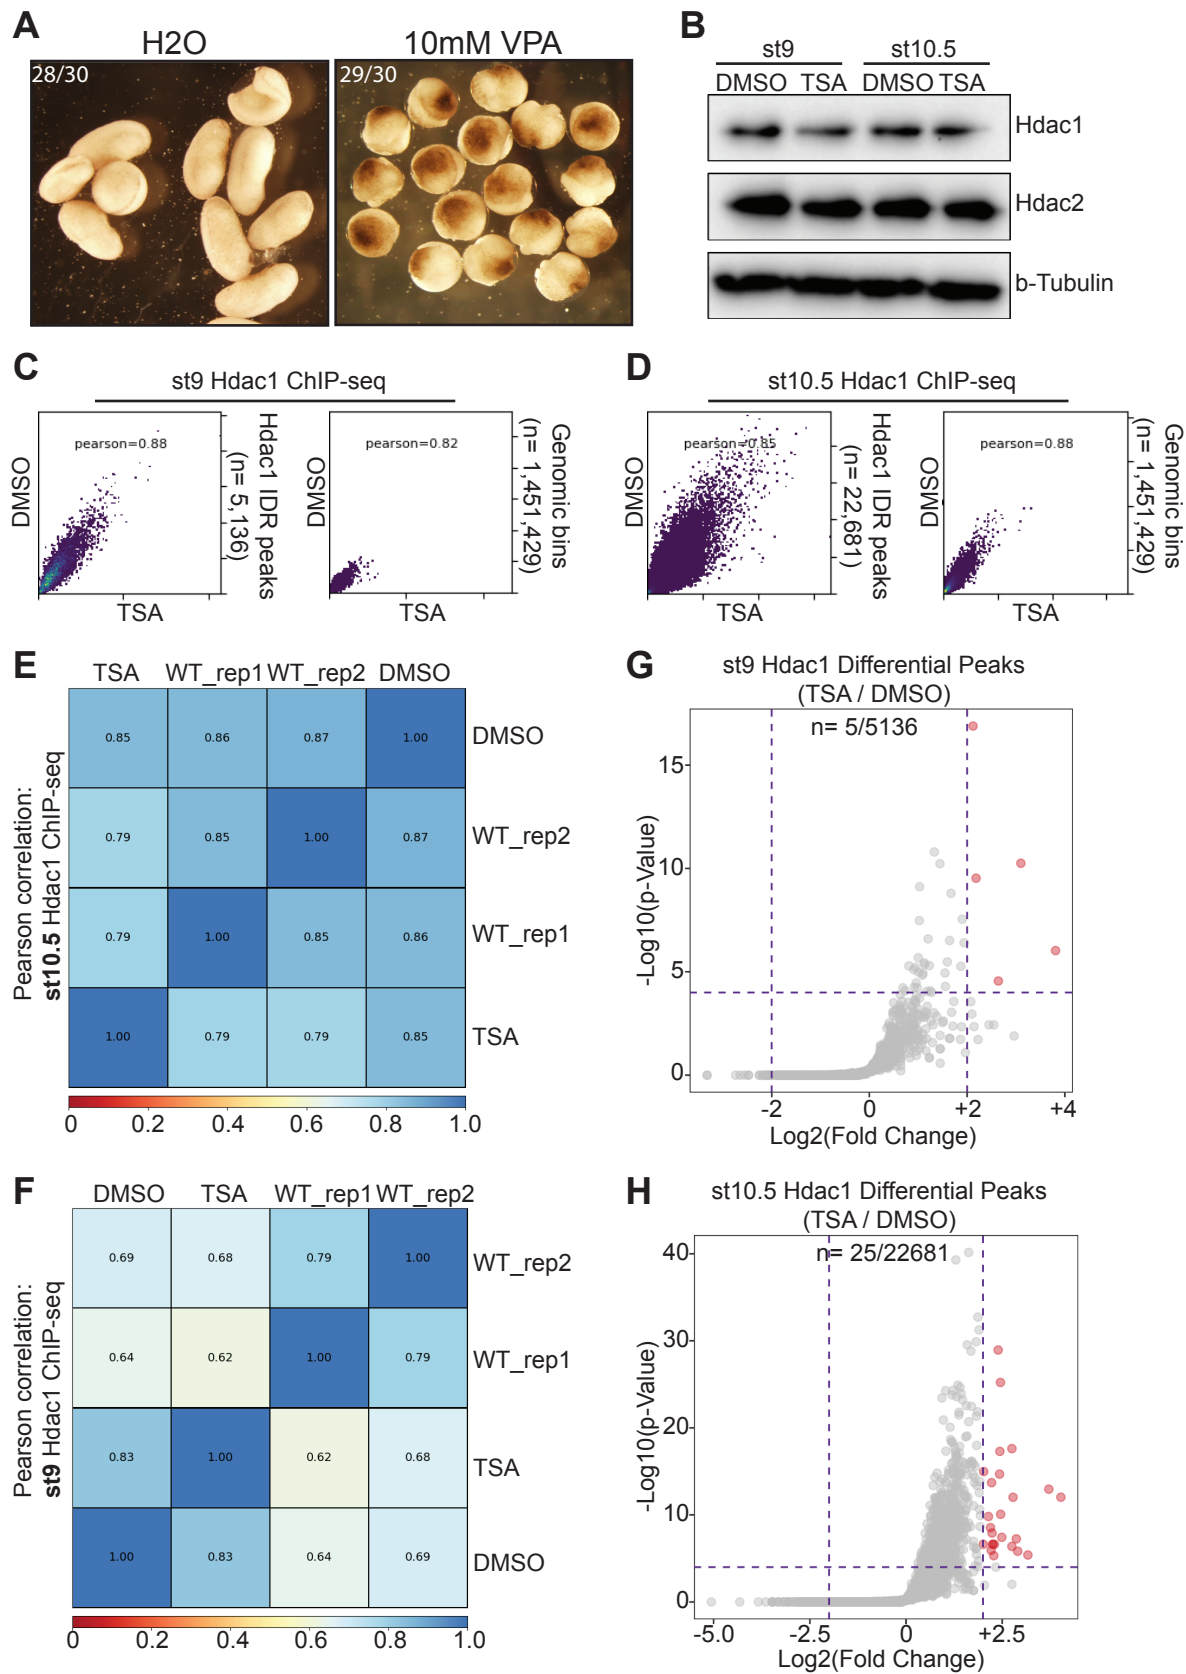

Supplement: supp [file elife-79380-supp-v1.zip]

Fig 4-figure supplementary 2

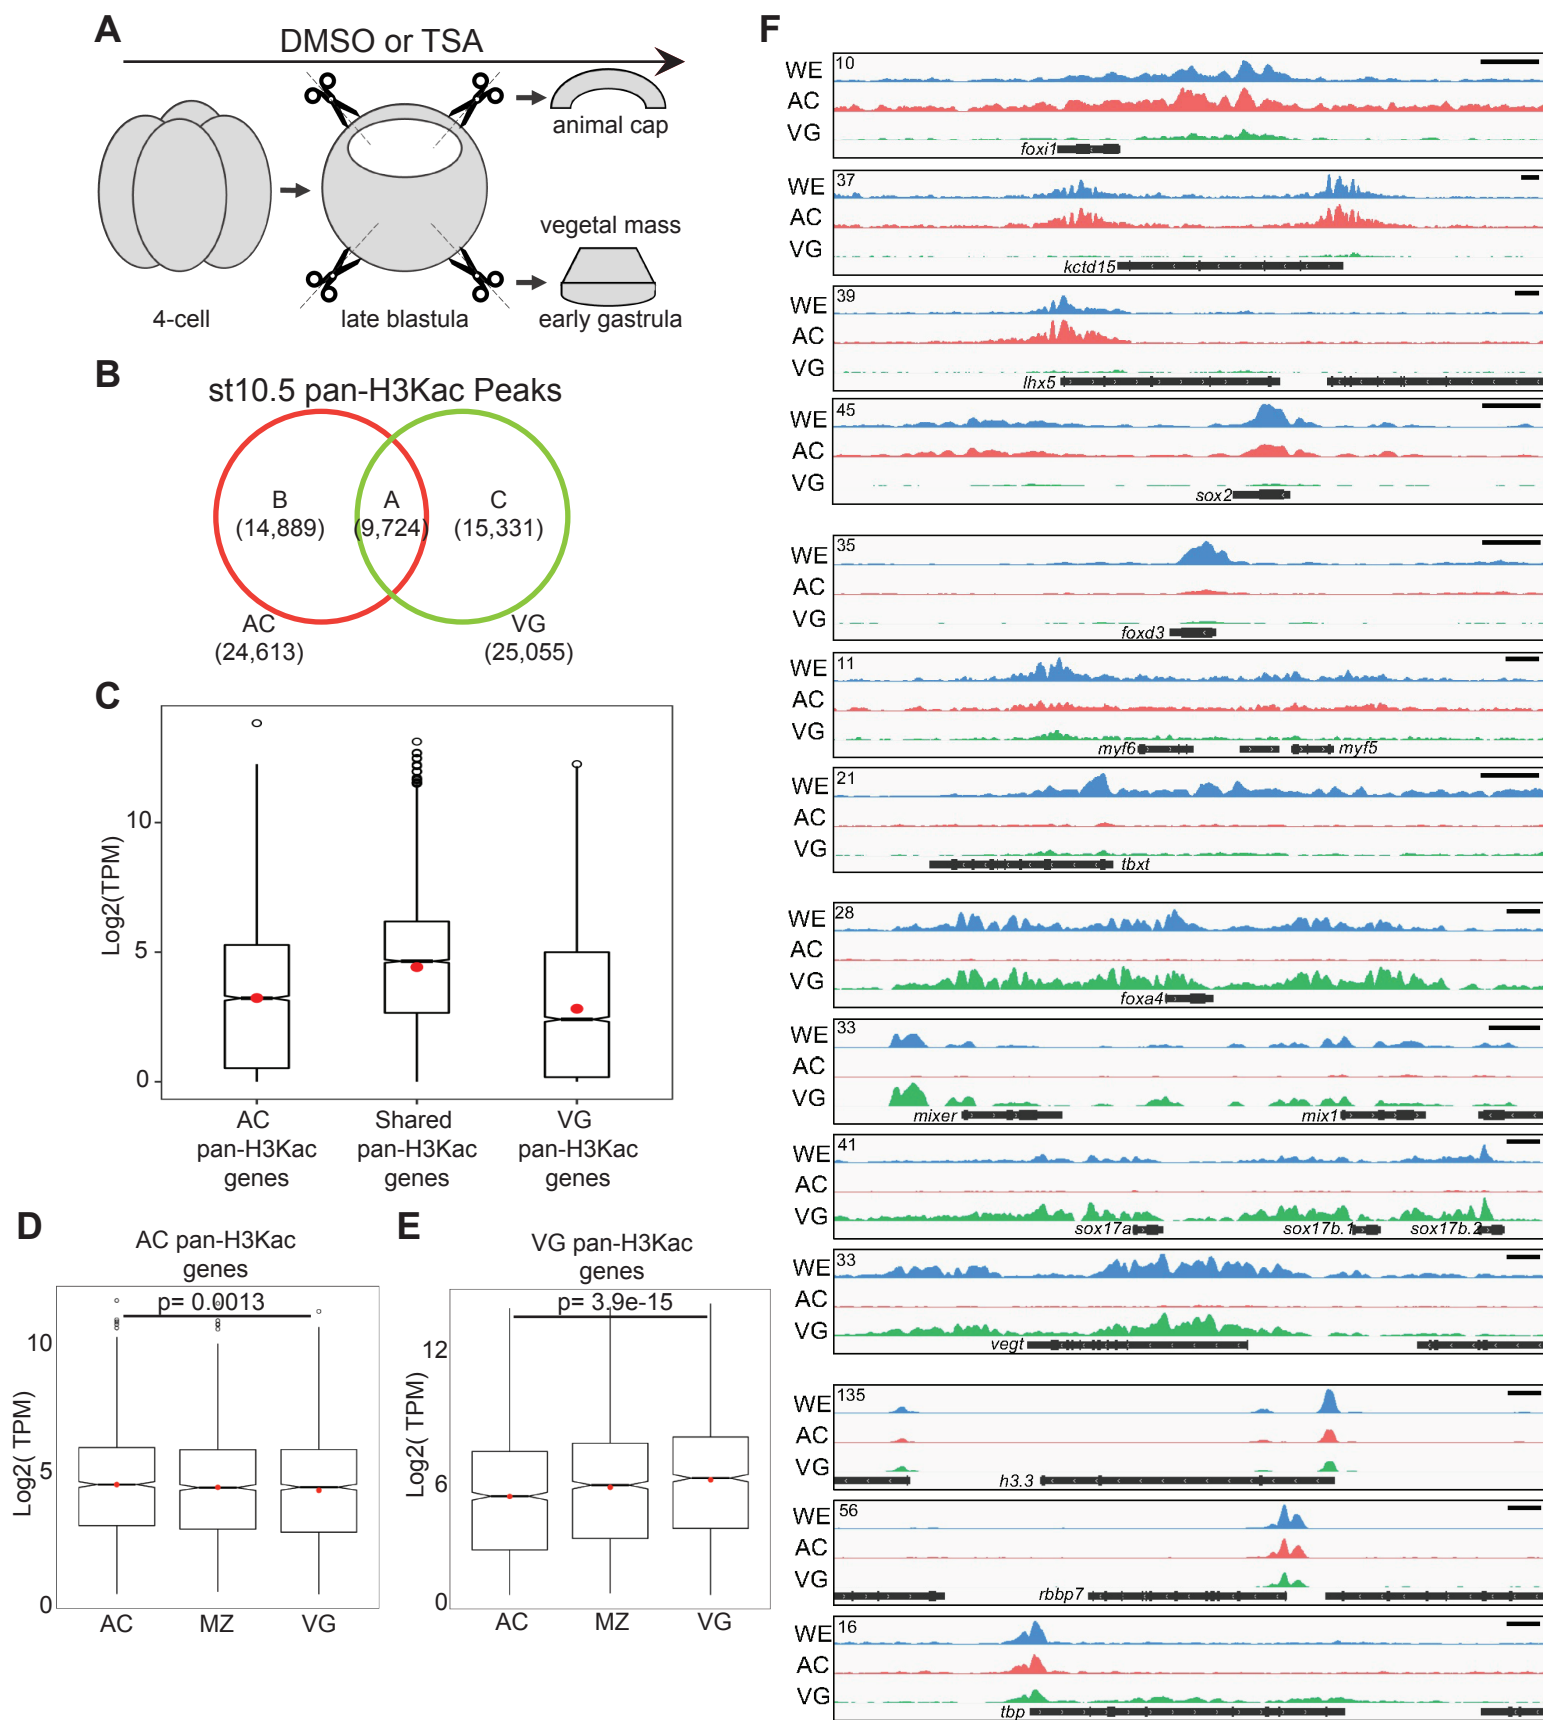

Supplement: supp [file elife-79380-supp-v1.zip]

Fig 2-figure supplement 1

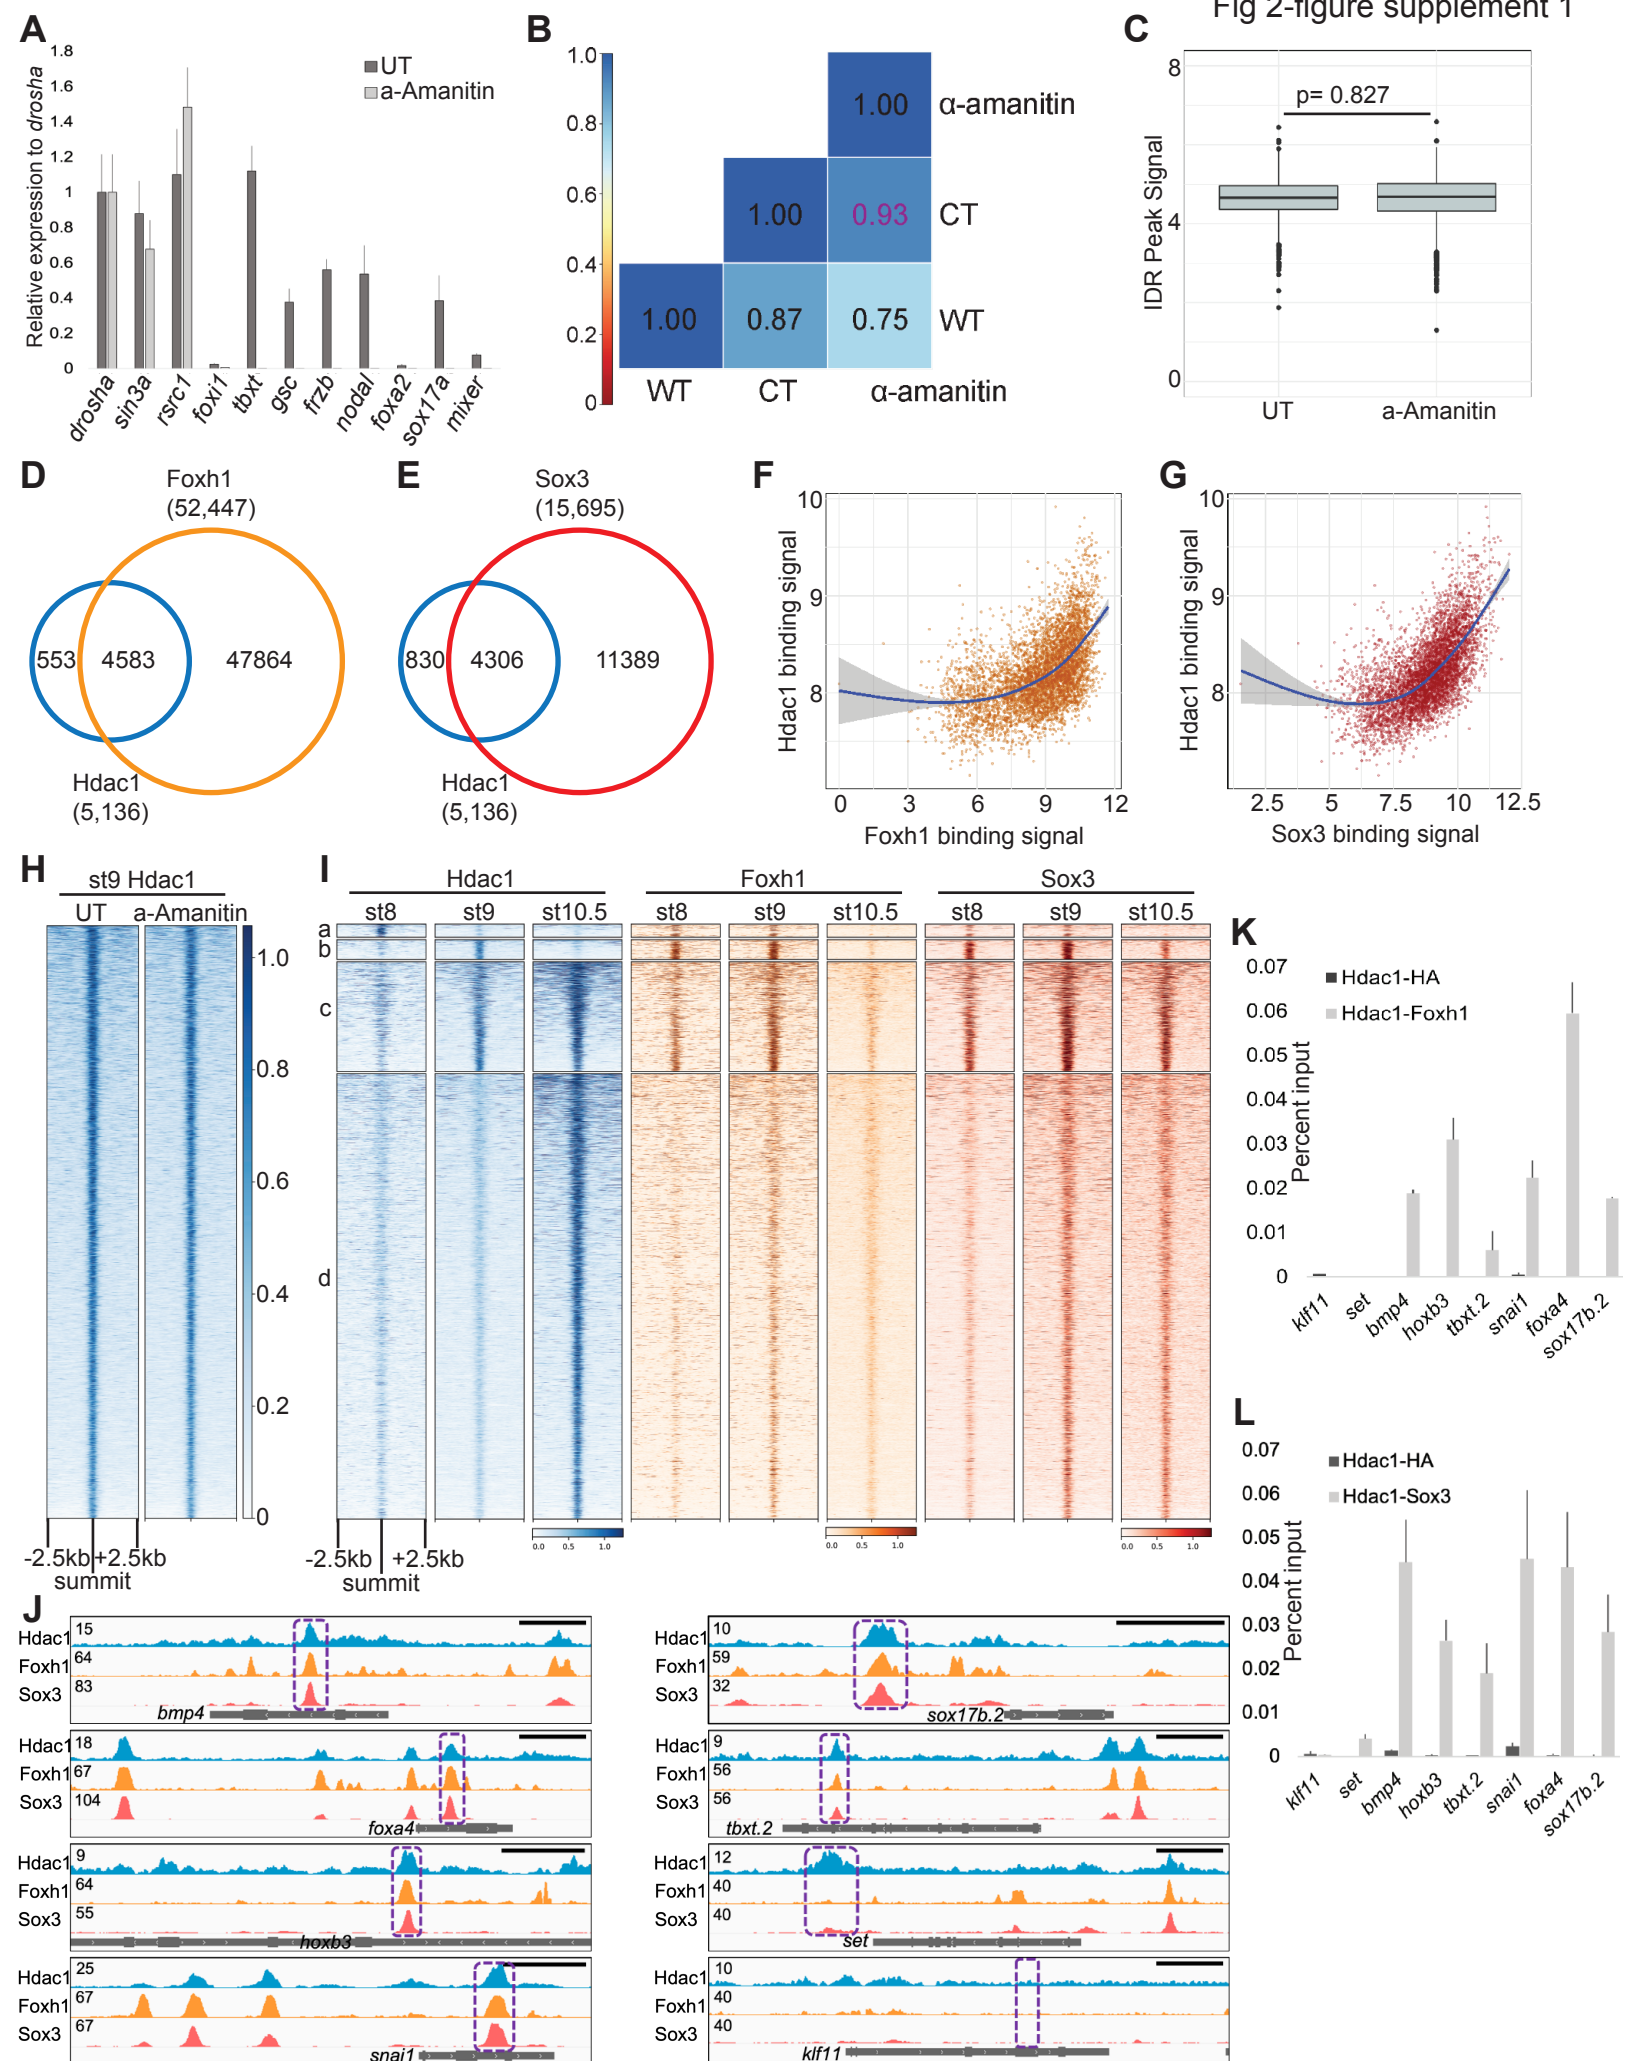

Supplement: supp [file elife-79380-supp-v1.zip]

Fig 5-figure supplement 1

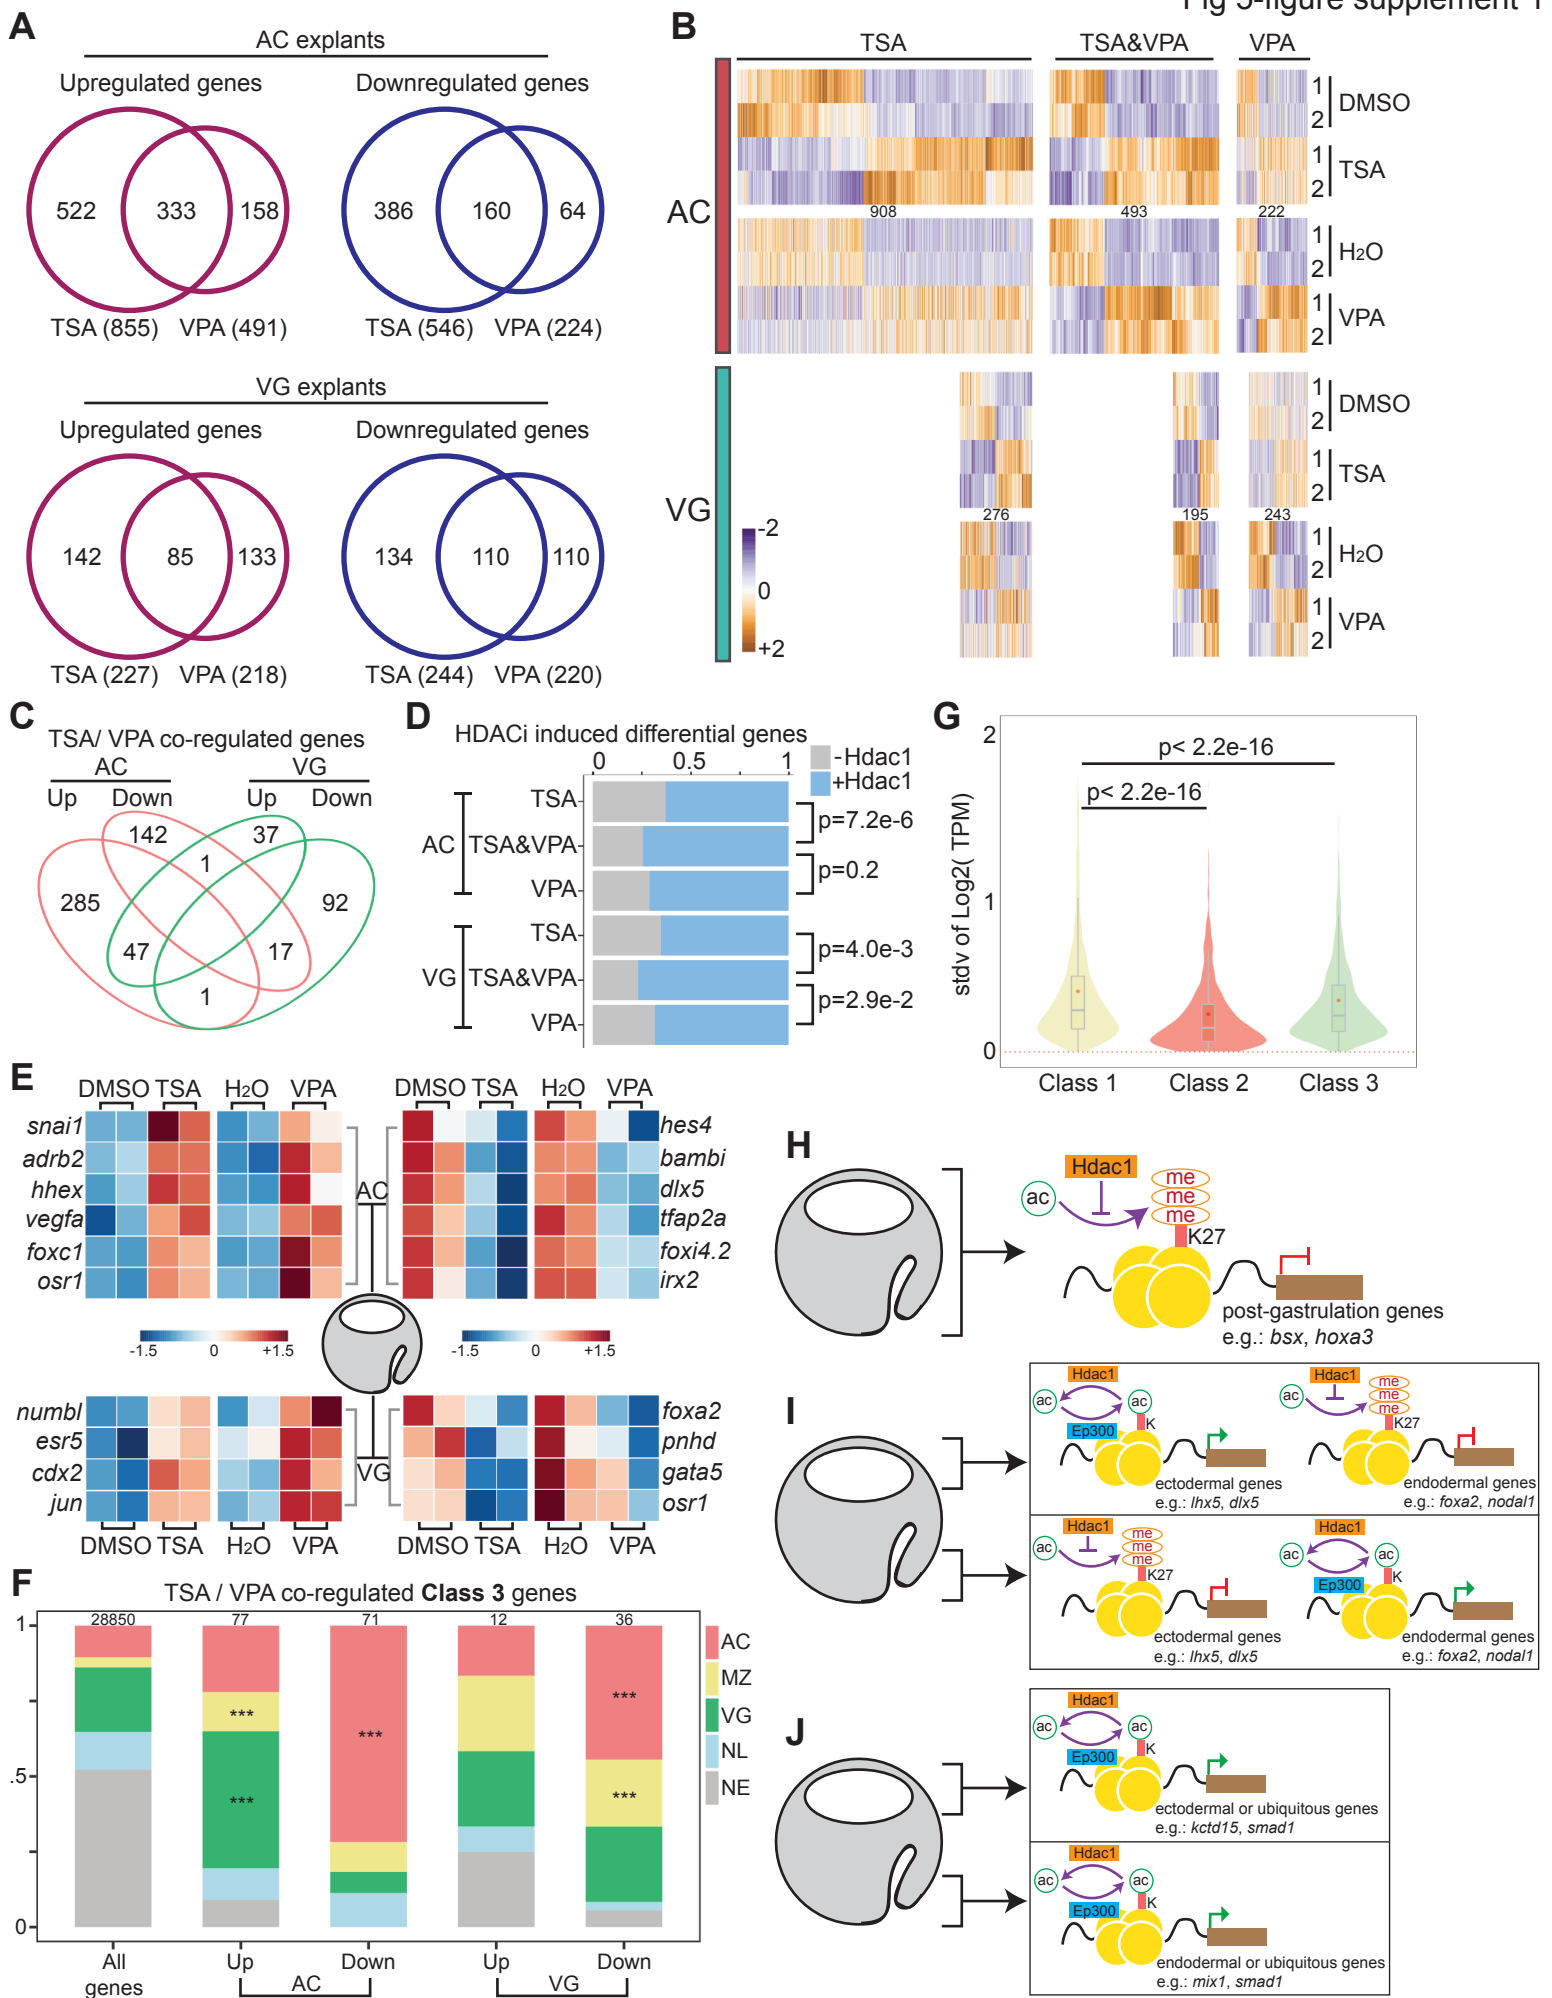

Supplement: supp [file elife-79380-supp-v1.zip]
